# Supplementary material for: GBSA: a comprehensive software for analysing whole genome bisulfite sequencing data
Source: PubMed Central journal article supplement — Nucleic Acids Res. 2012 Dec 24;41(4):e55. doi: 10.1093/nar/gks1281 (PMC3575794; doi:10.1093/nar/gks1281), 2012-12-24
Supplement: supp_gks1281_nar-00434-met-n-2012-File005.pdf [file supp_gks1281_nar-00434-met-n-2012-File005.pdf]

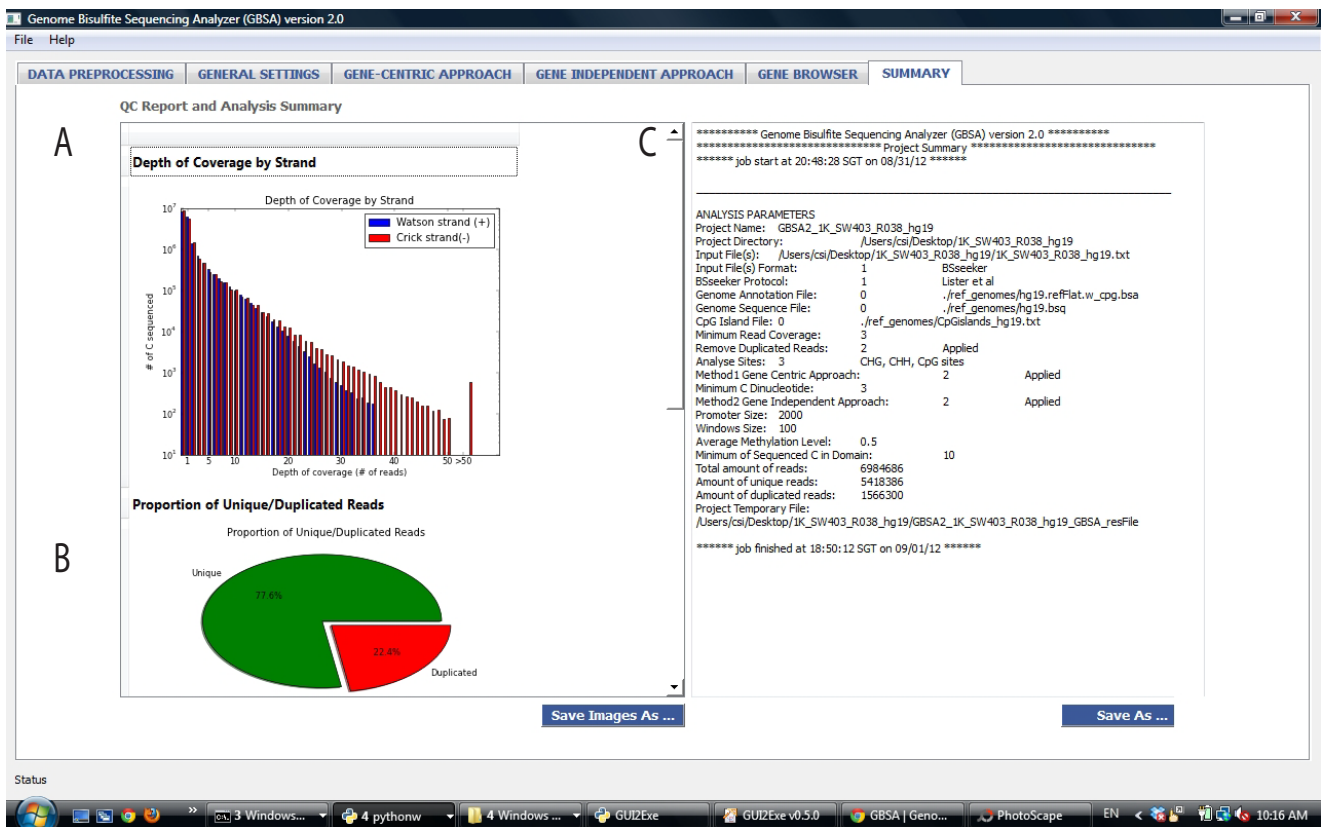

(B)

Supplementary Figure 1. Quality control report. The GBSA quality report consists of (A) the global depth of coverage, (B) the proportion of reads of duplicated reads relative to the total amount of sequenced reads and (C) summary of the analysis setup.

A

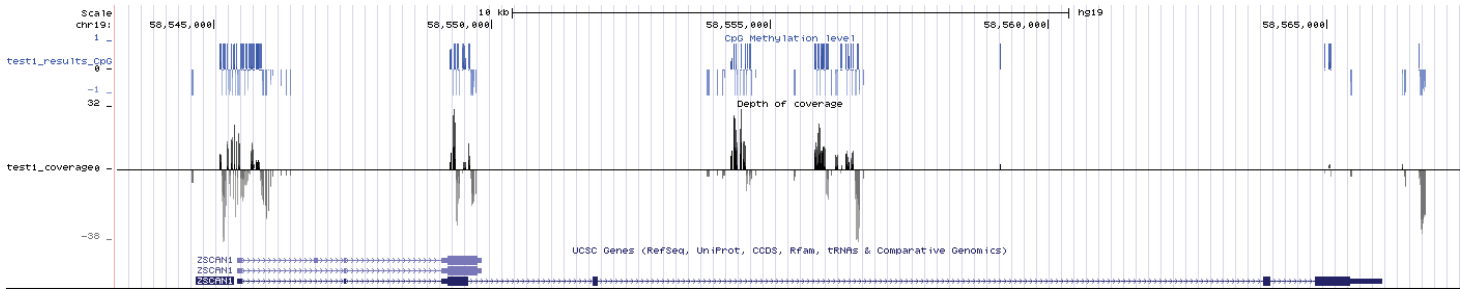

B

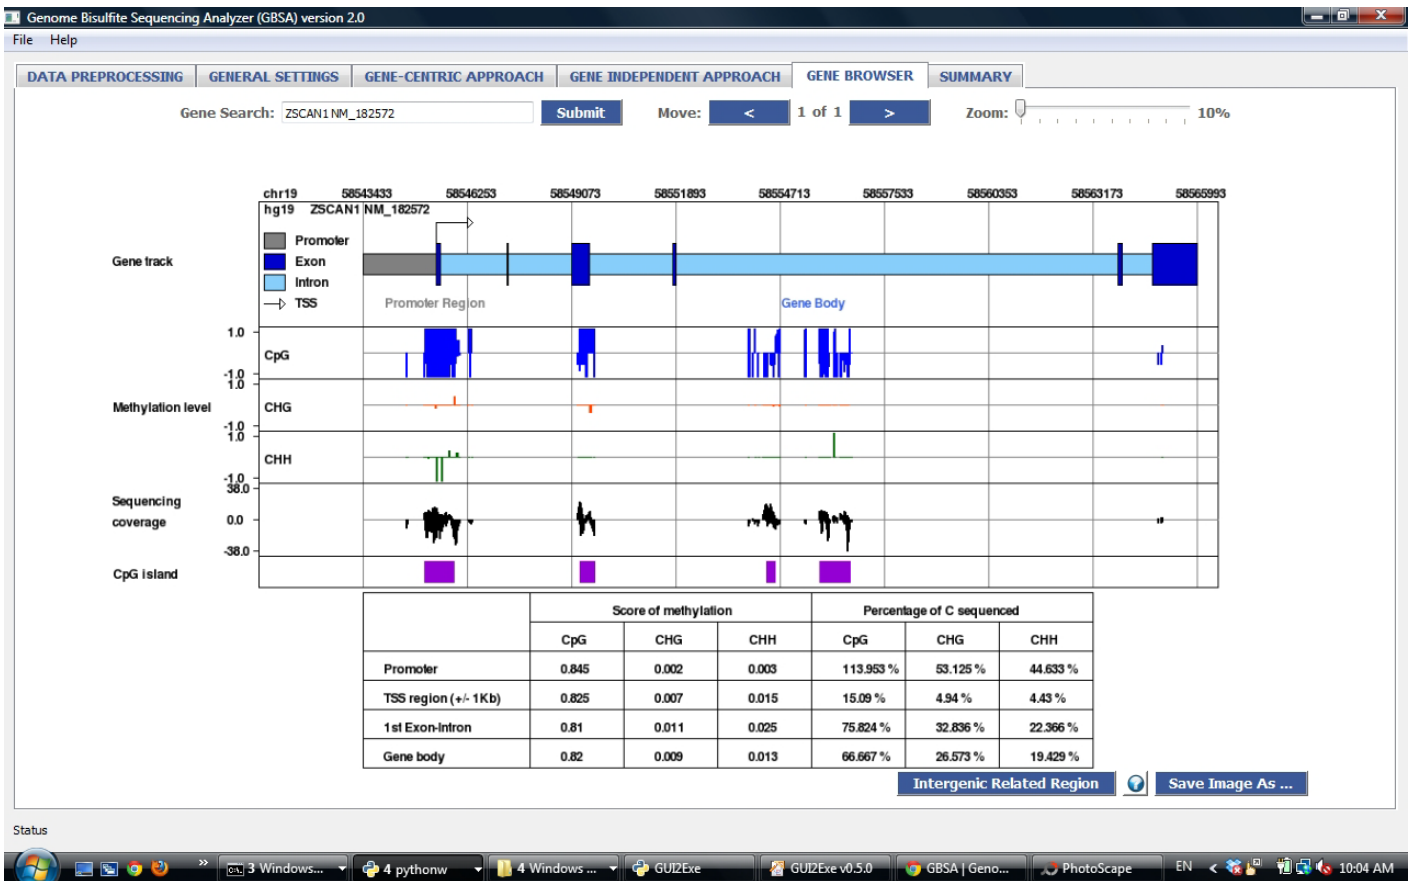

Supplementary Figure 2. Data visualisation. Cytosine methylation level as well the genome depth of coverage can be visualised via (A) all genome browsers which are compatible with the bedgraph format such as UCSC or (B) the GBSA GUI.
